# Supplementary material
Source: Elsevier journal article supplement (https://www.sciencedirect.com/science/article/pii/S1130239919300641)
Supplement: mmc1 [file S1130239919300641:mmc1.docx]

**Anexo 1**

**
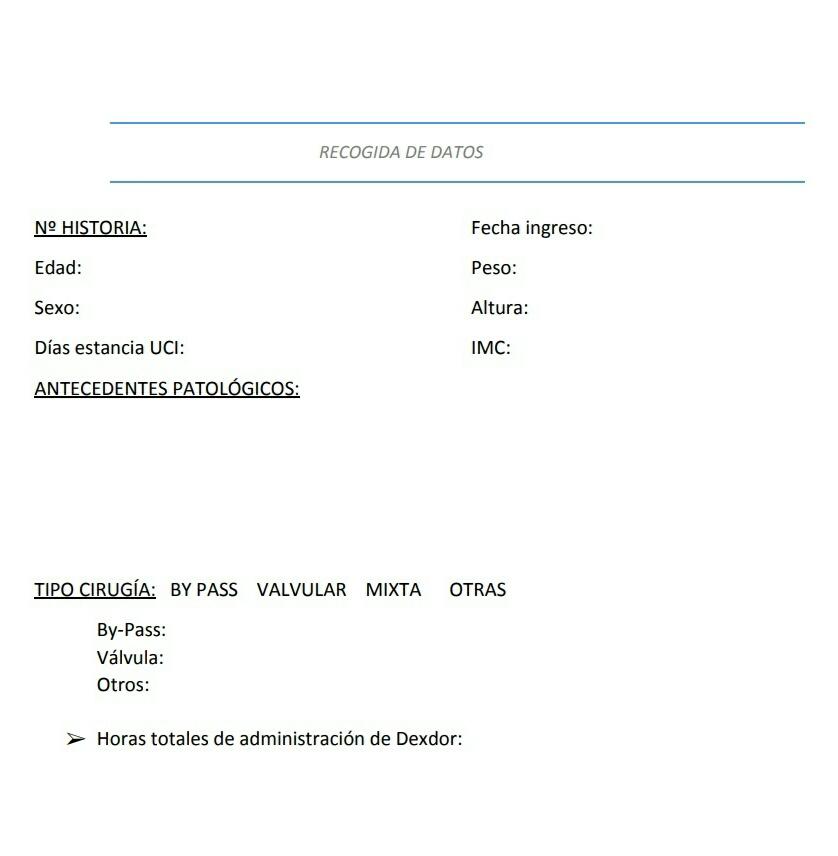
**

**
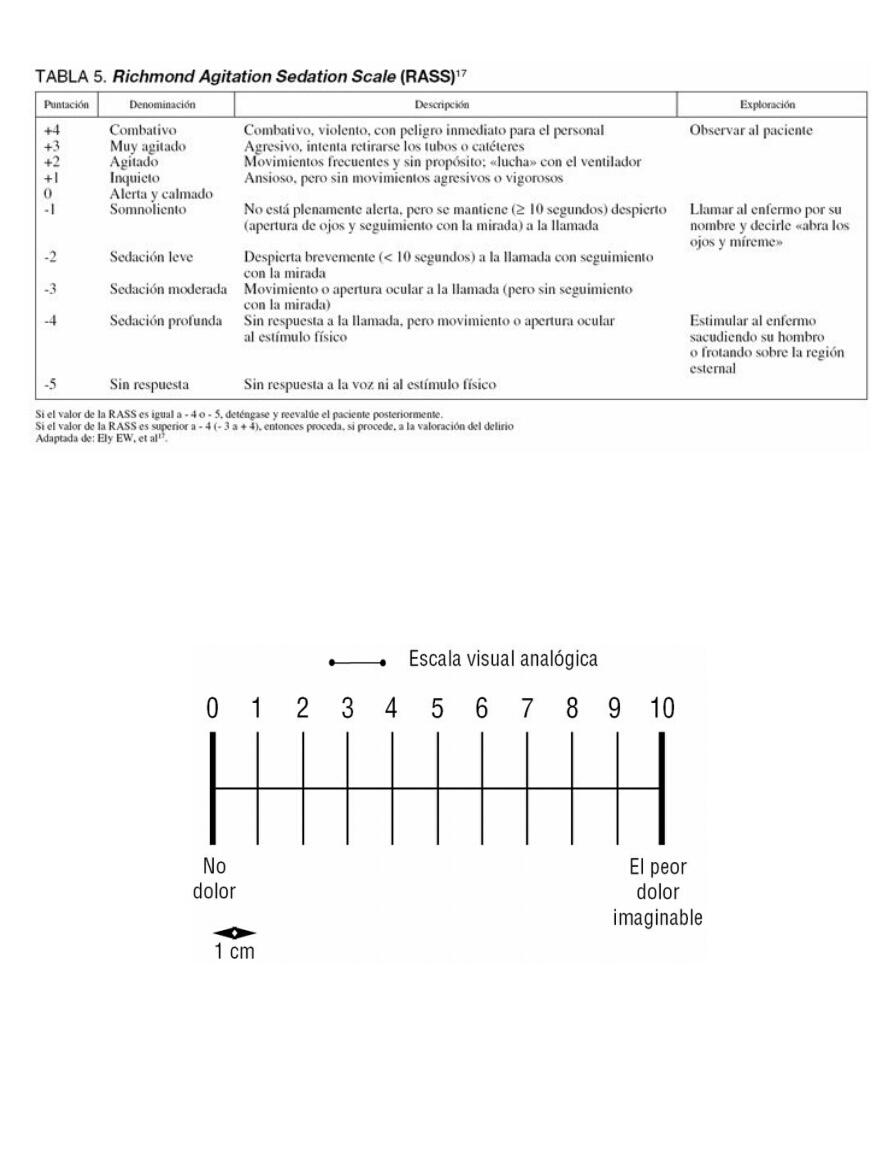
**

| **Nº HISTORIA: FECHA DE INGRESO:________________** |
| --- |

| **Horas**  **Variables** | **Ingreso** | **+1** | **+2** | **+3** | **+4** | **+5** | **+6** | **+7** | **+8** | **+9** | **+10** | **+11** | **+12** |
| --- | --- | --- | --- | --- | --- | --- | --- | --- | --- | --- | --- | --- | --- |
| **RASS** |  |  |  |  |  |  |  |  |  |  |  |  |  |
| **EVA** |  |  |  |  |  |  |  |  |  |  |  |  |  |
| **DEX**  **mcg/kg/h** |  |  |  |  |  |  |  |  |  |  |  |  |  |
| **Sedantes/hipnóticos*** |  |  |  |  |  |  |  |  |  |  |  |  |  |
| **Analgesia*1** |  |  |  |  |  |  |  |  |  |  |  |  |  |
| **Analgesia de rescate*2** |  |  |  |  |  |  |  |  |  |  |  |  |  |
| **Elastómero** |  |  |  |  |  |  |  |  |  |  |  |  |  |

*Sedantes/hipnóticos: reflejar si precisa haloperidol, tranxilum, etc.

*1Analgesia: (1) Paracetamol, (2) Nolotil

*2Analgesia de rescate: (3) Enantyum, (4) Metadona, (5) Mórfico, (6) Otros (especificar cual). Reflejar cantidad (mg)

| **Nº HISTORIA: FECHA DE INGRESO:________________** |
| --- |

| **Horas**  **Variables** | **+13** | **+14** | **+15** | **+16** | **+17** | **+18** | **+19** | **+20** | **+21** | **+22** | **+23** | **+24** |
| --- | --- | --- | --- | --- | --- | --- | --- | --- | --- | --- | --- | --- |
| **RASS** |  |  |  |  |  |  |  |  |  |  |  |  |
| **EVA** |  |  |  |  |  |  |  |  |  |  |  |  |
| **DEX**  **mcg/kg/h** |  |  |  |  |  |  |  |  |  |  |  |  |
| **Sedantes/hipnóticos*** |  |  |  |  |  |  |  |  |  |  |  |  |
| **Analgesia*1** |  |  |  |  |  |  |  |  |  |  |  |  |
| **Analgesia de rescate*2** |  |  |  |  |  |  |  |  |  |  |  |  |
| **Elastómero** |  |  |  |  |  |  |  |  |  |  |  |  |

*Sedantes/hipnóticos: reflejar si precisa haloperidol, tranxilum, etc.

*1Analgesia: (1) Paracetamol, (2) Nolotil

*2Analgesia de rescate: (3) Enantyum, (4) Metadona, (5) Mórfico, (6) Otros (especificar cual). Reflejar cantidad (mg)
